# Supplementary material for: Preparation of β- and γ-lactams from carbamoyl radicals derived from oxime oxalate amides
Source: Royal Society of Chemistry journal article supplement (doi:10.1039/b315223e), 2004-01-01
Supplement: b315223e.doc [file b315223e.doc]

**Supplementary Information (ESI)**

Preparation of - and -lactams from carbamoyl radicals derived from oxime oxalate amides

Eoin M. Scanlan, Alexandra M. Z. Slawin and John C. Walton*

a University of St. Andrews, School of Chemistry, St. Andrews, Fife, KY16 9ST, UK. Fax: 01334 463808; Tel: 01334 463864; E-mail: jcw@st-and.ac.uk

Gaussian98 ARC files for model carbamoyl radicals

**Me2NCO**

1|1|UNPC-UNK|Freq|UB3LYP|6-311+G(d,p)|C3H6N1O1(2)|PCUSER|25-Feb-2003|0 ||

#N GEOM=ALLCHECK GUESS=TCHECK UB3LYP/6-311+G(D,P) FREQ||

Me2NCO6-311+ Gdp||0,2|

C,-0.9600776466,0.0000036837,0.5100171213|

O,-0.9888695416,0.0 00008722,1.7104198632|

N,0.0878748364,0.0000004363,-0.3188052274|

C,1.4548177133,-0.0000004886,0.2305264173|

C,-0.1009075752,-0.0000092532,-1.7643146984|

H,1.6185638941,0.8873765517,0.8461757016|

H,1.6185656985,-0.8 873809034,0.8461705078|

H,2.1663604087,0.000002663,-0.5947518409|

H,0.34 93556257,0.8899974108,-2.2153061694|

H,0.349346191,-0.890027094,-2.2152 937321|

H,-1.1693542894,-0.0000051102,-1.9760898223||

Version=x86-Win32- G98RevA.11|

HF=-247.9308759|S2=0.753474|S2-1=0.|S2A=0.750007|RMSD=2.646 e-009

|RMSF=1.258e-004|Dipole=1.0345719,-0.0000078,-1.2859826|

**MeN(H)CO**

1|1|UNPC-UNK|Freq|UB3LYP|6-311+G(d,p)|C2H4N1O1(2)|PCUSER|24-Feb-2003|0 ||

#N GEOM=ALLCHECK GUESS=TCHECK UB3LYP/6-311+G(D,P) FREQ||

MeNHCOtrans6 -311+Gdp||0,2|

C,-0.5376477343,0.0000041071,0.6067621752|

O,-0.547559817 9,0.0000150852,1.8034799401|

N,0.4857269241,0.0000057691,-0.2532364176|

C,0.3263975139,-0.000020913,-1.7015612928|

H,1.4273535485,0.0000175385, 0.1315433605|

H,-0.7391337606,0.0000181926,-1.9277829646|

H,0.7798715964 ,0.8901374967,-2.1450923262|

H,0.7798000124,-0.8902334578,-2.1450579617 ||

Version=x86-Win32-G98RevA.11|HF=-208.6137756|S2=0.753279|S2-1=0.|S2A =0.750006|

RMSD=4.679e-009|RMSF=3.902e-005|Dipole=0.8567046,-0.0000086, -1.3540558|

**BnN(Me)CO**

1|1|UNPC-UNK|Freq|UB3LYP|6-311+G(d,p)|C9H10N1O1(2)|PCUSER|05-Mar-2003| 0||

#N GEOM=ALLCHECK GUESS=TCHECK UB3LYP/6-311+G(D,P) FREQ||

BnMeNCO6-31 1+Gdp||0,2|

C,-1.563479372,1.085721011,2.1035228829|

O,-1.6402247757,1.0 787088279,3.3004450981|

N,-0.5035209698,1.203663408,1.2943328355|

C,-0.6 799509968,1.1964449493,-0.1591420721|

C,-0.0316836473,0.010301173,-0.85 05055874|

C,0.8591871439,0.204543758,-1.9079602304|

C,1.43245234,-0.8836 833149,-2.5667463002|

C,1.1217166569,-2.1810975465,-2.1681961497|

C,0.2346559958,-2.3850874992,-1.1101951301|

C,-0.338532941,-1.297390589,-0.4576364783|

C,0.8553344973,1.3746740018,1.8283599037|

H,-0.2731187317,2.1267378467,-0.5710257475|

H,-1.7569748693,1.2004358569,-0.3418275429|

H,1.1075221857,1.2139888934,-2.2210785479|

H,2.1228871281,-0.7160683238,-3. 385771439|

H,1.5671424752,-3.0288763782,-2.6762737919|

H,-0.012621775,-3.3930109266,-0.796168867|

H,-1.0269493193,-1.4623403177,0.3645655626|

H, 1.506893152,0.5744206697,1.4697951592|

H,1.2660204966,2.3378203543,1.5097501415|

H,0.8074461906,1.3450221863,2.9151394084||

Version=x86-Win32-G 98RevA.11|HF=-479.0398385|S2=0.753385|S2-1=0.|S2A=0.750007|

RMSD=4.547e-009|RMSF=1.560e-005|Dipole=1.0493619,-0.0106982,-1.2572253|

**BnN(H)CO**

1|1|UNPC-UNK|Freq|UB3LYP|6-311+G(d,p)|C8H8N1O1(2)|PCUSER|28-Feb-2003|0 ||

#N GEOM=ALLCHECK GUESS=TCHECK UB3LYP/6-311+G(D,P) FREQ||BnHNCO6-311+ Gdp||0,2|

C,-1.8030388003,-0.3060835165,2.4679128533|

O,-1.8600646019,0.032244981,3.6143475214|

N,-1.4494863565,0.3807864743,1.3756441734|

C,-1. 4401965966,-0.1844200865,0.0276167665|

C,-0.0893800732,-0.08441868,-0.6 540323323|

C,0.0133358819,0.456857277,-1.9373552691|

C,1.24712876,0.5259 693524,-2.5849031372|

C,2.3939616404,0.0565073031,-1.9501261799|

C,2.301 4307646,-0.4827277745,-0.6662584666|

C,1.0689448246,-0.5530759616,-0.02 34952917|

H,-1.167762187,1.3525758333,1.4893072211|

H,-2.1978952222,0.31 27693632,-0.585768419|

H,-1.7441495625,-1.229020235,0.1329189985|

H,-0.8 769786956,0.827784543,-2.435600887|

H,1.3104878206,0.9503325102,-3.5805 821543|

H,3.3545864966,0.1114438705,-2.4495077818|

H,3.1907826451,-0.850 2189385,-0.1666959423|

H,1.0047316064,-0.9707795952,0.9754859222||

Version=x86-Win32-G98RevA.11|HF=-439.7216237|S2=0.753285|S2-1=0.|S2A=0.750006|

RMSD=2.675e-009|RMSF=4.438e-006|Dipole=0.4664449,0.3553283,-1.5257208|
